# Supplementary material
Source: ML conference proceedings conference paper supplement (https://openreview.net/forum?id=Ed1DBB3sBQ)

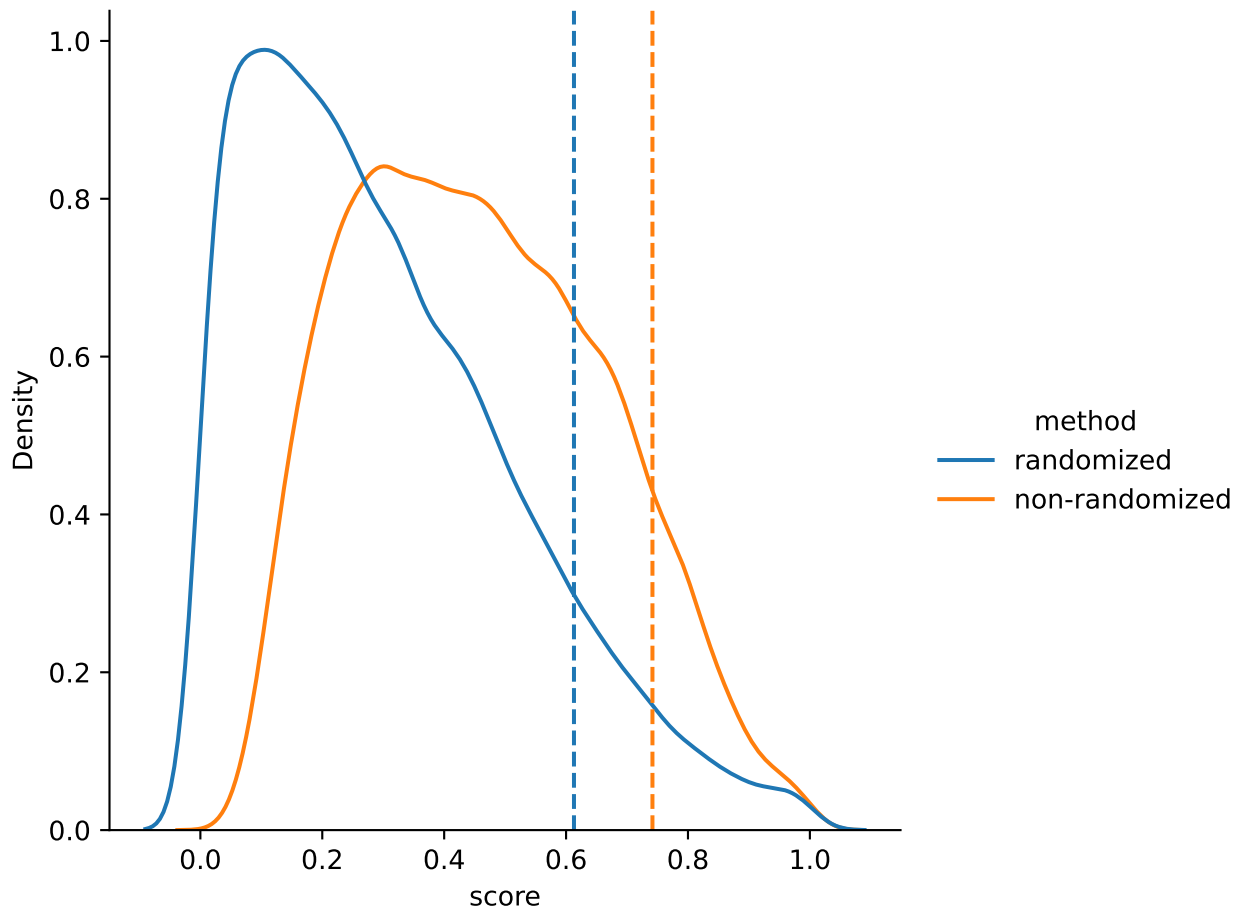

Supplement: supplementary_material [file attachment]

dataset = ogbn-arxiv

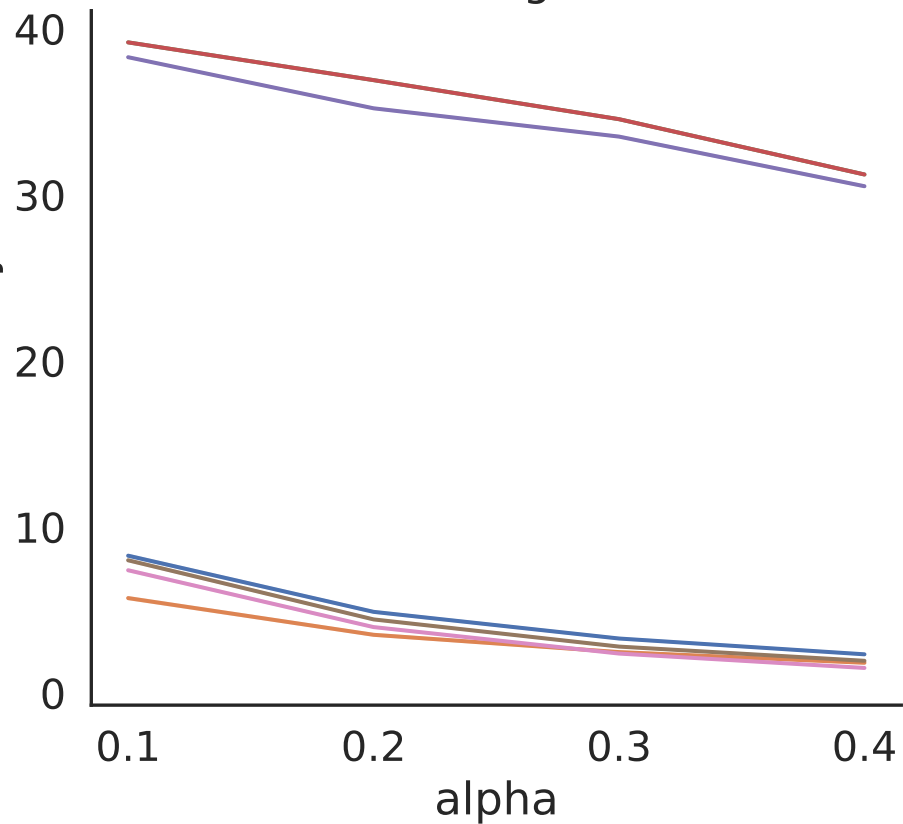

dataset = ogbn-products

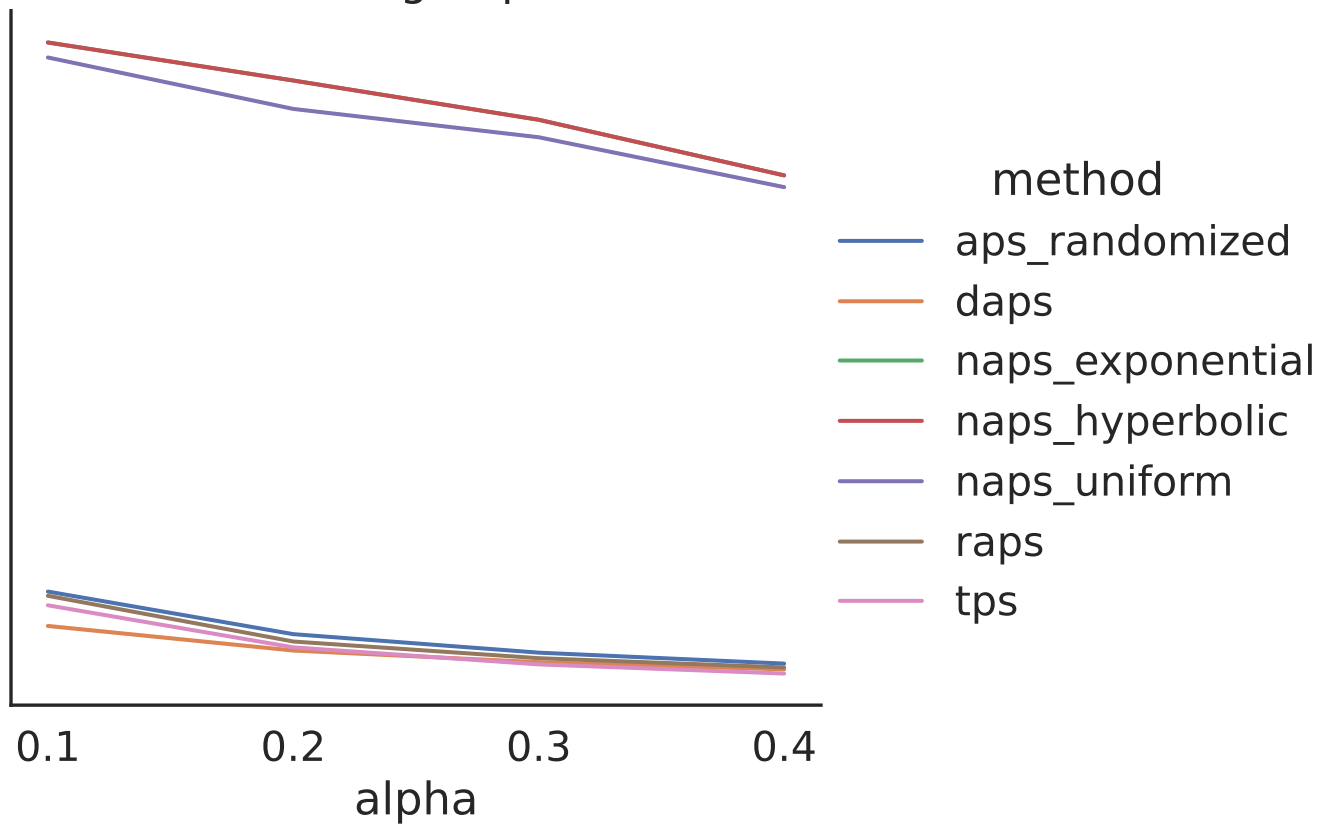

Supplement: supplementary_material [file attachment]

dataset = Flickr

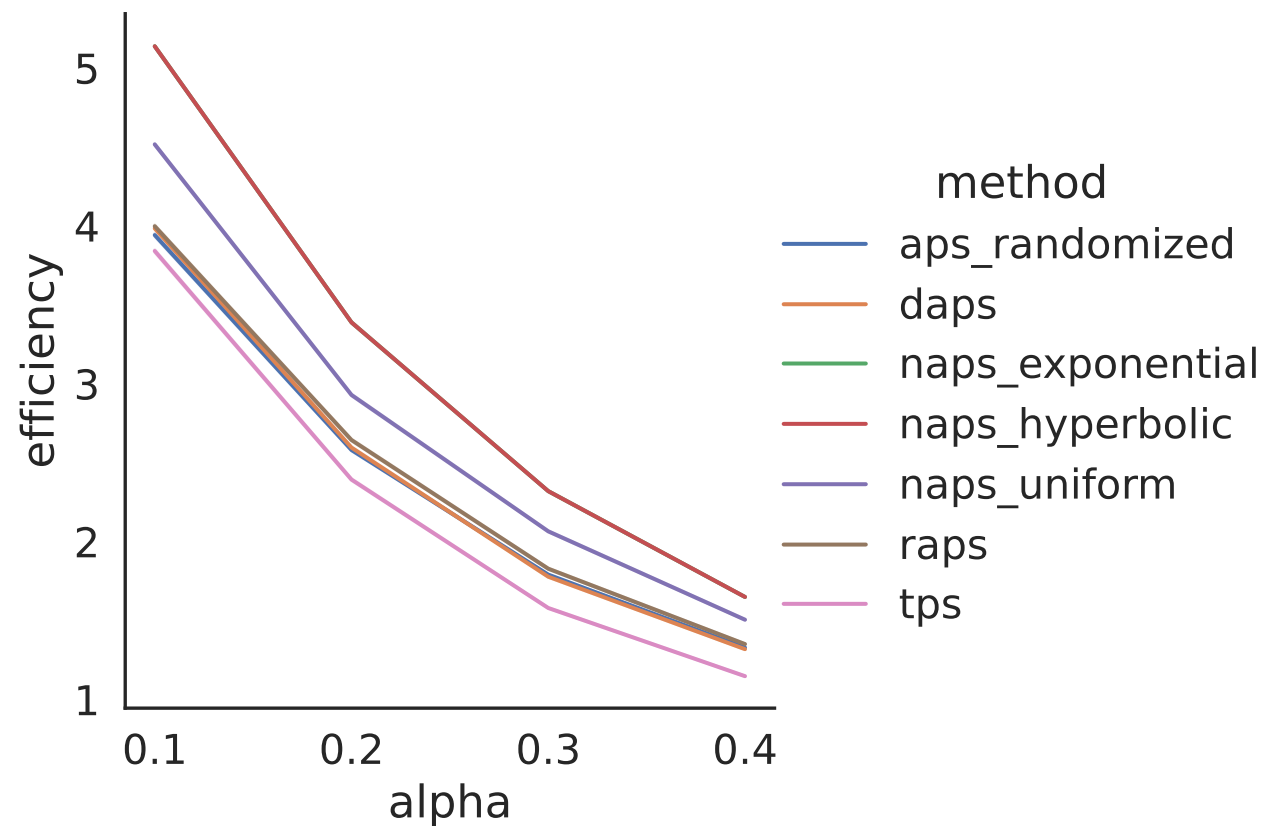

Supplement: supplementary_material [file attachment]

dataset = ogbn-arxiv

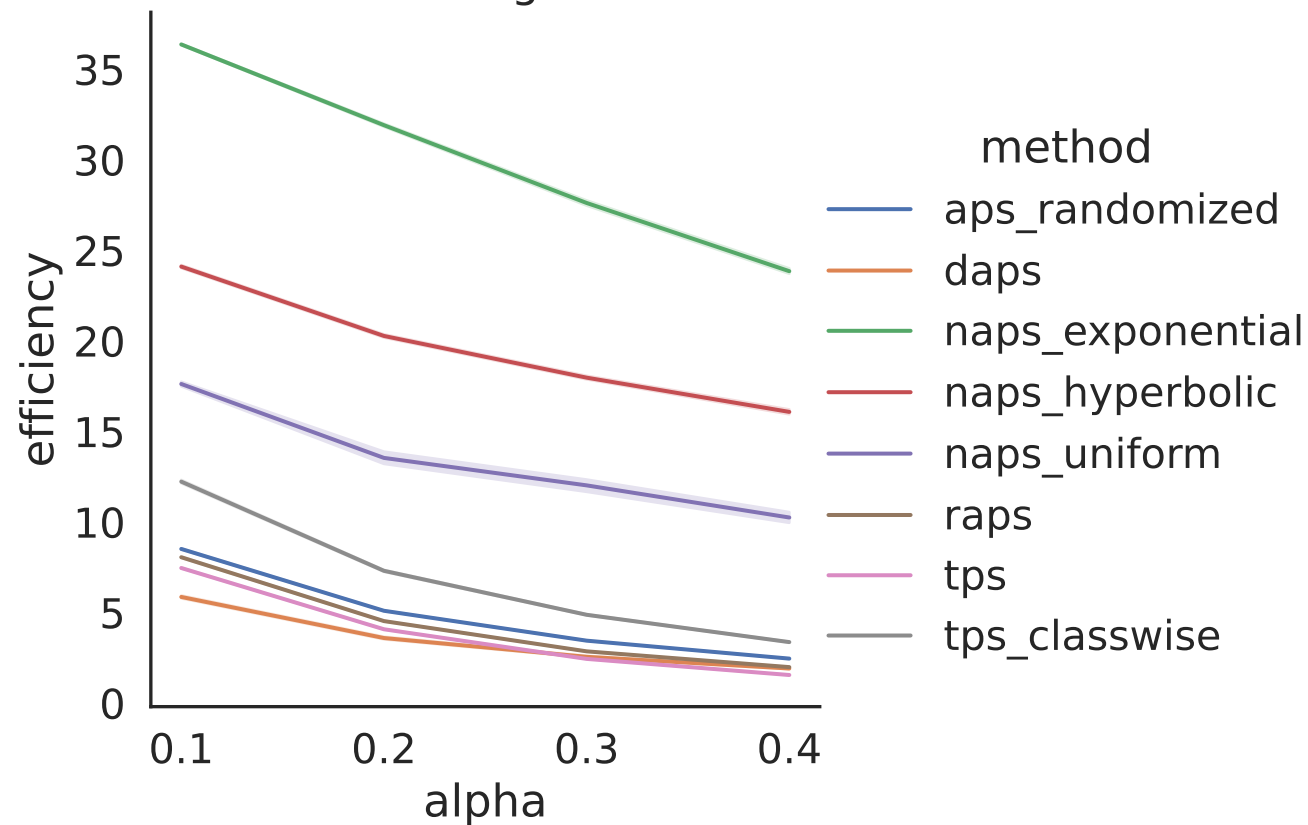

Supplement: supplementary_material [file attachment]

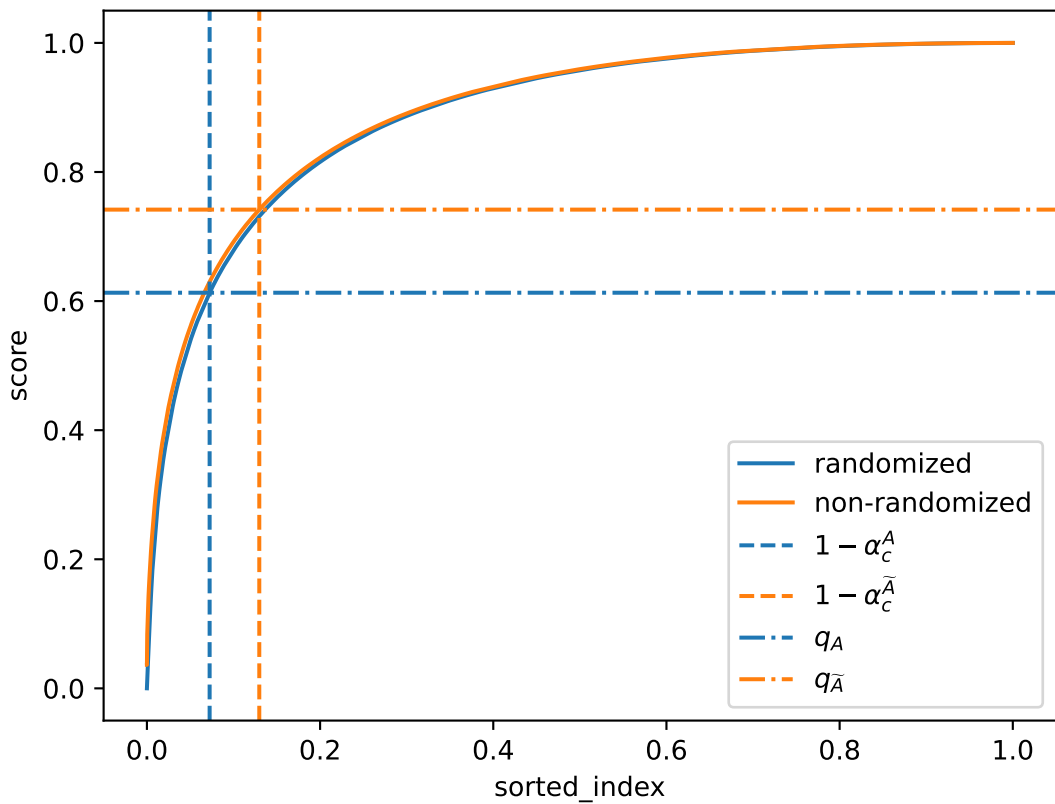

Supplement: supplementary_material [file attachment]

dataset = Flickr

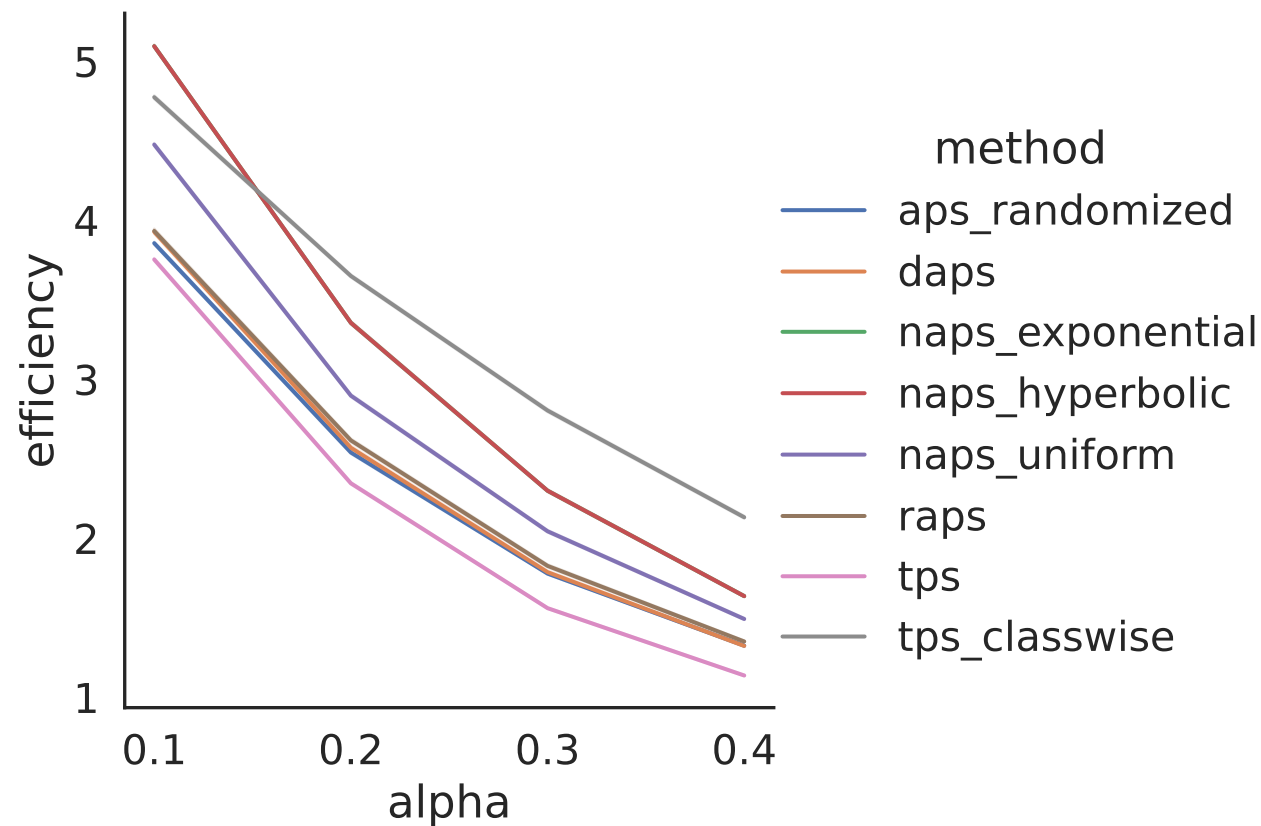

Supplement: supplementary_material [file attachment]
